# Supplementary material for: Fully computational design of PAM-relaxed Staphylococcus aureus Cas9 with expanded targeting capability using UniDesign
Source: eLife. 2026 May 6;15:RP110906. doi: 10.7554/eLife.110906 (PMC13148819; doi:10.7554/eLife.110906)
Supplement: Supplementary file 2. [file elife-110906-supp2.xlsx]

## Sheet: Sheet 1
I. List of DNA sequences of constructs used in this study
Construct	Sequence(5'->3')
WT-SaCas9	ggtcgacattgattattgactagttattaatagtaatcaattacggggtcattagttcatagcccatatatggagttccgcgttacataacttacggtaaatggcccgcctggctgaccgcccaacgacccccgcccattgacgtcaataatgacgtatgttcccatagtaacgccaatagggactttccattgacgtcaatgggtggagtatttacggtaaactgcccacttggcagtacatcaagtgtatcatatgccaagtacgccccctattgacgtcaatgacggtaaatggcccgcctggcattatgcccagtacatgaccttatgggactttcctacttggcagtacatctacgtattagtcatcgctattaccatggtcgaggtgagcccc…
KRH-SaCas9	ggtcgacattgattattgactagttattaatagtaatcaattacggggtcattagttcatagcccatatatggagttccgcgttacataacttacggtaaatggcccgcctggctgaccgcccaacgacccccgcccattgacgtcaataatgacgtatgttcccatagtaacgccaatagggactttccattgacgtcaatgggtggagtatttacggtaaactgcccacttggcagtacatcaagtgtatcatatgccaagtacgccccctattgacgtcaatgacggtaaatggcccgcctggcattatgcccagtacatgaccttatgggactttcctacttggcagtacatctacgtattagtcatcgctattaccatggtcgaggtgagcccc…
WT-ABE	ggtcgacattgattattgactagttattaatagtaatcaattacggggtcattagttcatagcccatatatggagttccgcgttacataacttacggtaaatggcccgcctggctgaccgcccaacgacccccgcccattgacgtcaataatgacgtatgttcccatagtaacgccaatagggactttccattgacgtcaatgggtggagtatttacggtaaactgcccacttggcagtacatcaagtgtatcatatgccaagtacgccccctattgacgtcaatgacggtaaatggcccgcctggcattatgcccagtacatgaccttatgggactttcctacttggcagtacatctacgtattagtcatcgctattaccatggtcgaggtgagcccc…
KKH-ABE	ggtcgacattgattattgactagttattaatagtaatcaattacggggtcattagttcatagcccatatatggagttccgcgttacataacttacggtaaatggcccgcctggctgaccgcccaacgacccccgcccattgacgtcaataatgacgtatgttcccatagtaacgccaatagggactttccattgacgtcaatgggtggagtatttacggtaaactgcccacttggcagtacatcaagtgtatcatatgccaagtacgccccctattgacgtcaatgacggtaaatggcccgcctggcattatgcccagtacatgaccttatgggactttcctacttggcagtacatctacgtattagtcatcgctattaccatggtcgaggtgagcccc…
KRH-ABE	ggtcgacattgattattgactagttattaatagtaatcaattacggggtcattagttcatagcccatatatggagttccgcgttacataacttacggtaaatggcccgcctggctgaccgcccaacgacccccgcccattgacgtcaataatgacgtatgttcccatagtaacgccaatagggactttccattgacgtcaatgggtggagtatttacggtaaactgcccacttggcagtacatcaagtgtatcatatgccaagtacgccccctattgacgtcaatgacggtaaatggcccgcctggcattatgcccagtacatgaccttatgggactttcctacttggcagtacatctacgtattagtcatcgctattaccatggtcgaggtgagcccc…
II. List of sgRNA sequences used in this study
Site	Spacer sequence(5'->3')	Scaffold sequence(5'->3')
EMX1	GTGTGGTTCCAGAACCGGAGGA	gttttagtactctggaaacagaatctactaaaacaaggcaaaatgccgtgtttatctcgtcaacttgttggcgaga
RNF2	GCAGTCATCTTAGTCATTACC	gttttagtactctggaaacagaatctactaaaacaaggcaaaatgccgtgtttatctcgtcaacttgttggcgaga
RUNX1	GAGGGTGCATTTTCAGGAGGA	gttttagtactctggaaacagaatctactaaaacaaggcaaaatgccgtgtttatctcgtcaacttgttggcgaga
FANCF-1	GAGACCGCCAGAAGCTCGGAAA	gttttagtactctggaaacagaatctactaaaacaaggcaaaatgccgtgtttatctcgtcaacttgttggcgaga
FANCF-2	GGGGTCCCAGGTGCTGACGTA	gttttagtactctggaaacagaatctactaaaacaaggcaaaatgccgtgtttatctcgtcaacttgttggcgaga
VEGFA	GGGTGAGTGAGTGTGTGCGTG	gttttagtactctggaaacagaatctactaaaacaaggcaaaatgccgtgtttatctcgtcaacttgttggcgaga
III. List of PCR primers used in this study
Primer name	Sequence (5'->3')
EMX1-onTarget-DS-F	CAGCTCAGCCTGAGTGTTGA
EMX1-onTarget-DS-R	CTCGTGGGTTTGTGGTTGC
RNF2-onTarget-DS-F	GCCAACATACAGAAGTCAGGAA
RNF2-onTarget-DS-R	TCAGGCTGTGCAGACAAACG
RUNX1-onTarget-DS-F	AGATGTAGGGCTAGAGGGGTG
RUNX1-onTarget-DS-R	CACCGAGGCATCTCTGCAC
FANCF-1-onTarget-DS-F	TGCATTTCGACCAATAGCATTGC
FANCF-1-onTarget-DS-R	ATGGATGTGGCGCAGGTAG
FANCF-2-onTarget-DS-F	TGCATTTCGACCAATAGCATTGC
FANCF-2-onTarget-DS-R	ATGGATGTGGCGCAGGTAG
VEGFA-onTarget-DS-F	CAGTCACTAGGGGGCGCT
VEGFA-onTarget-DS-R	GAGCCGTTCCCTCTTTGCTA
EMX1-OT1-DS-F	CCCAGCACCTCTCACCAATA
EMX1-OT1-DS-R	CACACATCTGTGGAGGGTCTT
EMX1-OT2-DS-F	ACACGTGGATGTGTCTACAGC
EMX1-OT2-DS-R	TTCTGACCTCAGGTGATCCACC
EMX1-OT3-DS-F	GGGCTCGGGAGAGCAGA
EMX1-OT3-DS-R	CGGTTGTATTCGTCGTCGTC
EMX1-OT4-DS-F	GTCAGACGGGAGTCAGAACC
EMX1-OT4-DS-R	GAGTCTCGGAGCTGCCAC
EMX1-OT5-DS-F	TTGCGCCCCTAGTTTTATTTG
EMX1-OT5-DS-R	AGCTTCATGGAGGACACTTC
RNF2-OT1-DS-F	CCCACCCCCTTTTAATCGTT
RNF2-OT1-DS-R	TACAGGGCCAAGGAAGCATAA
RNF2-OT2-DS-F	CAGTGATTGACAAGTAAGTGCAT
RNF2-OT2-DS-R	ACAGTCAGAATGAGCTTGGCT
RNF2-OT3-DS-F	GAGCAGAGGCCTCAGAAGCA
RNF2-OT3-DS-R	CACAGCCTTGACCTAGACTCCT
RNF2-OT4-DS-F	GCTACCACTATTCACCCAGAAGG
RNF2-OT4-DS-R	GGTGGAGAGGAGAGGACCAG
RNF2-OT5-DS-F	TTGGGGAGACAGTTCTCGAAG
RNF2-OT5-DS-R	TGGAGTGGAAGCAGAAAACCA
RUNX1-OT1-DS-F	TTCTCACACAAAGCGGGGAG
RUNX1-OT1-DS-R	TCTCTATCAGCTGCATCCGC
RUNX1-OT2-DS-F	AAAGGTGTCTCTCGCATCTCC
RUNX1-OT2-DS-R	AAAGGACTCCCATACAGCCAAG
RUNX1-OT3-DS-F	CACAGCCCTTCGTTCAAGTTAC
RUNX1-OT3-DS-R	GCAAGGCTTGTGCTTTATGTA
RUNX1-OT4-DS-F	ACACAAAGAGTATGTCAGGCCATC
RUNX1-OT4-DS-R	CCTCAACTGACTTCACAGGCT
RUNX1-OT5-DS-F	TCAGAGAGAAAGAGGGGCTGA
RUNX1-OT5-DS-R	CAACACACTGGTTAGGGGTGA
FANCF-2-OT1-DS-F	GAGGACTCGAAGGGGGTTTCA
FANCF-2-OT1-DS-R	TTCAGGGTGAGGGAGGTTCAC
FANCF-2-OT2-DS-F	TGATGAGGAGCAGATGCCTTTT
FANCF-2-OT2-DS-R	AGGTTGATCCTTCTGCCCTGA
FANCF-2-OT3-DS-F	TCATCACTCAAGATACGGGACC
FANCF-2-OT3-DS-R	TGCAGCAGGCTAAACACCTA
FANCF-2-OT4-DS-F	CCCCATAAAGGTGATTCCTAGGA
FANCF-2-OT4-DS-R	GGATGGCATGACATTTCTATCATATGC
FANCF-2-OT5-DS-F	CTTTGGCCCGGGAGTAGTTG
FANCF-2-OT5-DS-R	GGGGATGAGACGTGGTCAAG
IV. Predicted off-target site sequences used in this study
Off-target site	Sequence (5'->3')
EMX1-OT1	GTTTGGTTCAAGAACCGGAGGGCTAAAT
EMX1-OT2	GTGTGGTCCCTGGACCGGAGGCATCAAT
EMX1-OT3	GTCTGGTTCCAGAACCGCCGGACCAAGT
EMX1-OT4	GTGTGGTTCCAGAACCGCCGGGCCAAGT
EMX1-OT5	GTGTGGTTCCAGAACCGACGGGCTAAGT
RNF2-OT1	ACAGTCACATTAGTCATTAGCCTAAAT
RNF2-OT2	GTTGTTATCTTAGTCTTTACCTGAGAT
RNF2-OT3	GAAGTCATTGGAGTCATTACCATAAAT
RNF2-OT4	GGAGTCATCTTTGACCTTACCCTAAAT
RNF2-OT5	GCAGTTATATGAGTCATTACTAAAGGT
RUNX1-OT1	GACGGAGCCTTTTCAGGAGGACTTAAT
RUNX1-OT2	GAGGGAGCCTTTCCAGAAGGAGTTGAT
RUNX1-OT3	GAGGGTGGATTTTCAAGAAGGTCAAAT
RUNX1-OT4	GAGGGAGCATTTGCAAGAGAAGGTGGT
RUNX1-OT5	GAAGGTGCTTTTTCCCGAGGAGAGAGT
VEGFA-OT1	GGGGTCCCGGGTGCTGGGGCATCAGGT
VEGFA-OT2	GGGGTCCCTGATGAAGACGTATTTGGT
VEGFA-OT3	GGGGTTCCGGTTTCTGACGTATCCGGT
VEGFA-OT4	GTGGTCCCAGATCCTGATGTAGGTGAT
VEGFA-OT5	GGGATCCCAGGTGCTGCGGTTCCAGGT
